# Supplementary material for: Evolution of a New Function by Degenerative Mutation in Cephalochordate Steroid Receptors
Source: PubMed Central journal article supplement (PMC2527136; doi:10.1371/journal.pgen.1000191), 2008-09-12

Figure S6

Maximum likelihood phylogeny with approximate likelihood ratio statistic (LRS) for each node calculated using PHYML software.  $LRS=2\ln(L1/L2)$ , where L1 is the likelihood of the maximum likelihood phylogeny and L2 is the likelihood of the most likely phylogeny lacking the labeled node.

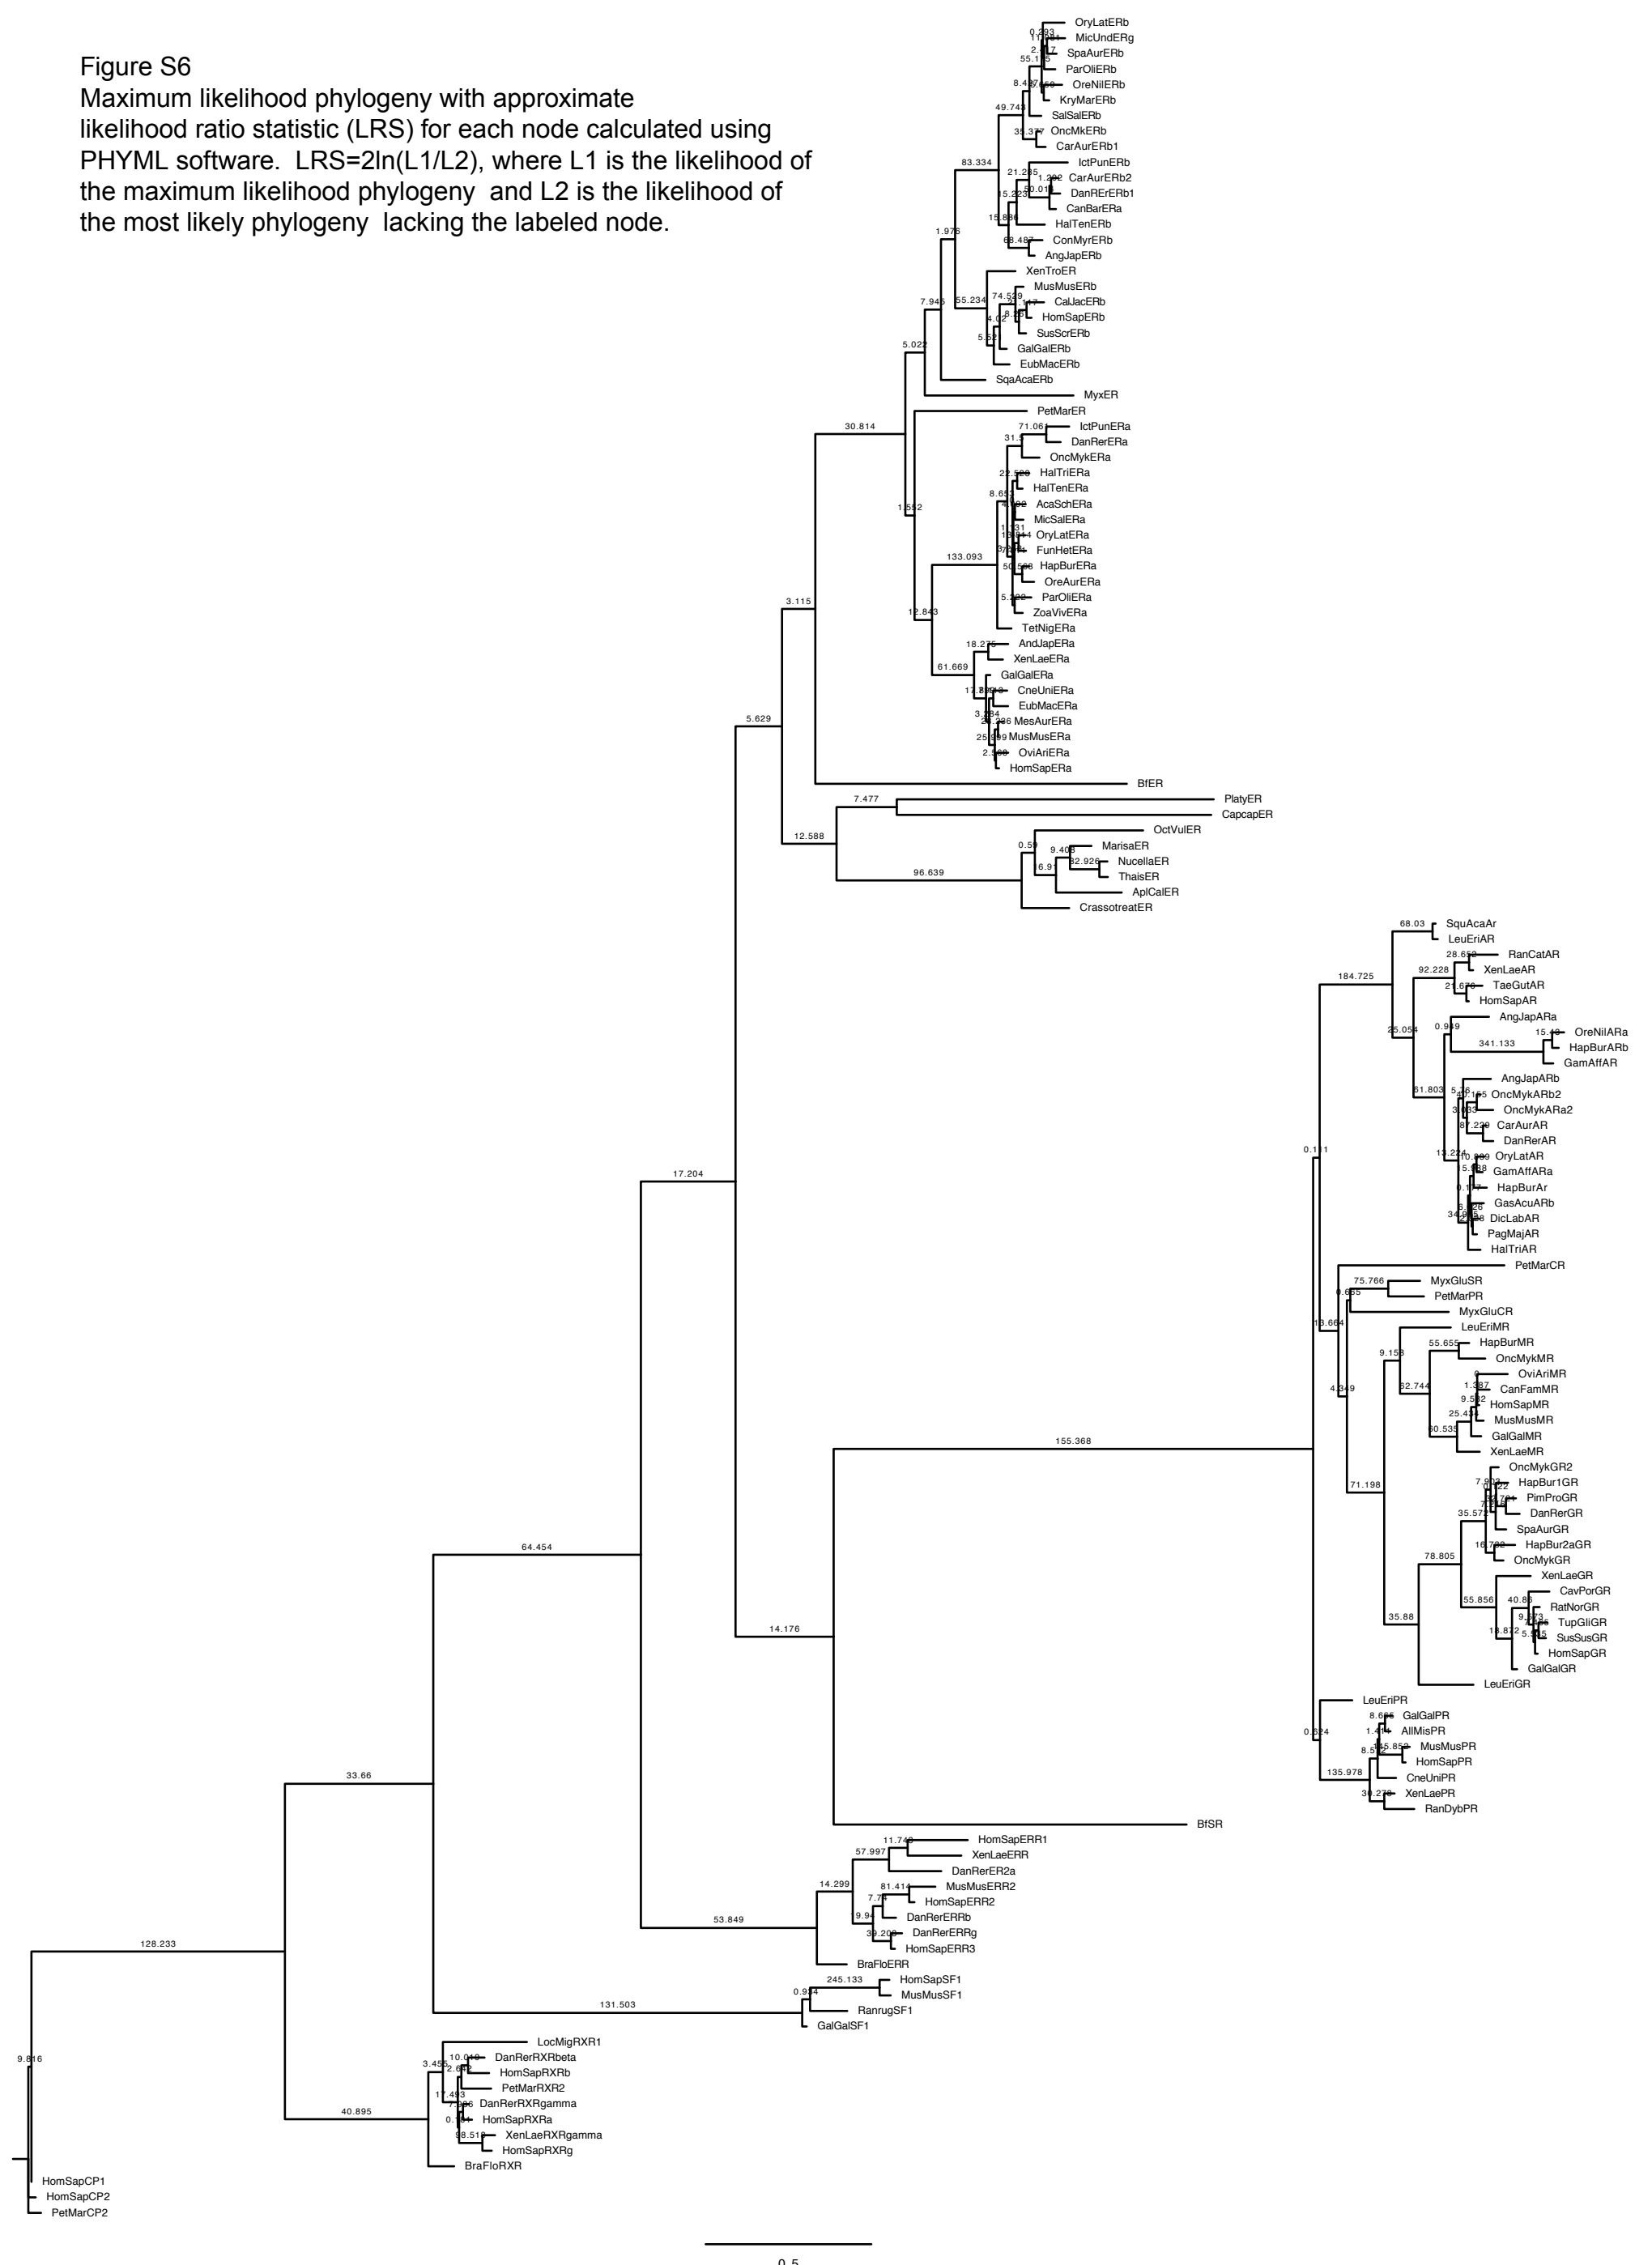

Supplement: pgen.1000191.s006.pdf [file pgen.1000191.s006.pdf]
